# Supplementary material for: In Vitro Human Liver Model for Toxicity Assessment with Clinical and Preclinical Instrumentation
Source: MDPI journal article supplement (doi:10.3390/pharmaceutics16050607), 2024-04-29
Supplement: s1 [file s1]

**Supplementary Table S2: Summary of liver markers in the two cell culture media used for liver model culturing.**

| <b>Clinical marker</b>        | <b>Hep medium</b> | <b>Williams E medium</b> |
|-------------------------------|-------------------|--------------------------|
| <i>Triglycerides (mmol/L)</i> | 0.02              | 0.1                      |
| <i>Glucose (mmol/L)</i>       | 9.4               | 10.67                    |
| <i>Albumin (g/L)</i>          | 0.5               | 3.4                      |
| <i>ALP (U/L)</i>              | 0                 | 0                        |
| <i>AST (U/L)</i>              | 2                 | 5                        |
| <i>ALT (U/L)</i>              | 2.6               | 1.5                      |
| <i>GGT (U/L)</i>              | 3.5               | 5.6                      |

Alanine aminotransferase (ALT), aspartate aminotransferase (AST), gamma-glutamyl transferase (GGT), alkaline phosphatase (ALP), glucose, triglycerides, and albumin
